# Supplementary material
Source: publisher figshare collection journal article supplement (https://acs.figshare.com/ndownloader/files/12853799)
Supplement: Supplementary file 1 [file 12853799]

## Supporting Information

### Gold Coating of Silver Nanoplates for Enhanced Dispersion Stability and Antimicrobial Activity against Intracellular Bacteria

Hiroaki Ichimaru, Ayaka Harada, Soichiro Yoshimoto, Yuta Miyazawa, Daigou Mizoguchi, Kaung Kyaw, Katsuhiko Ono, Hiroyasu Tsutsuki, Tomohiro Sawa, Takuro Niidome\*

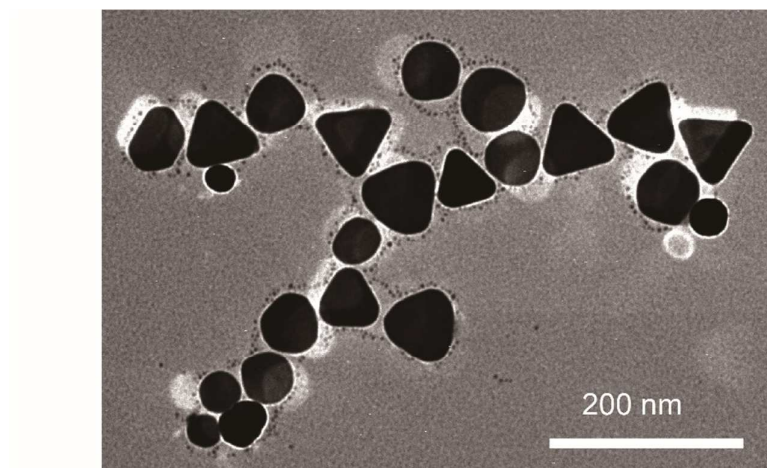

**Figure S1.** TEM image of Ag NPLs.

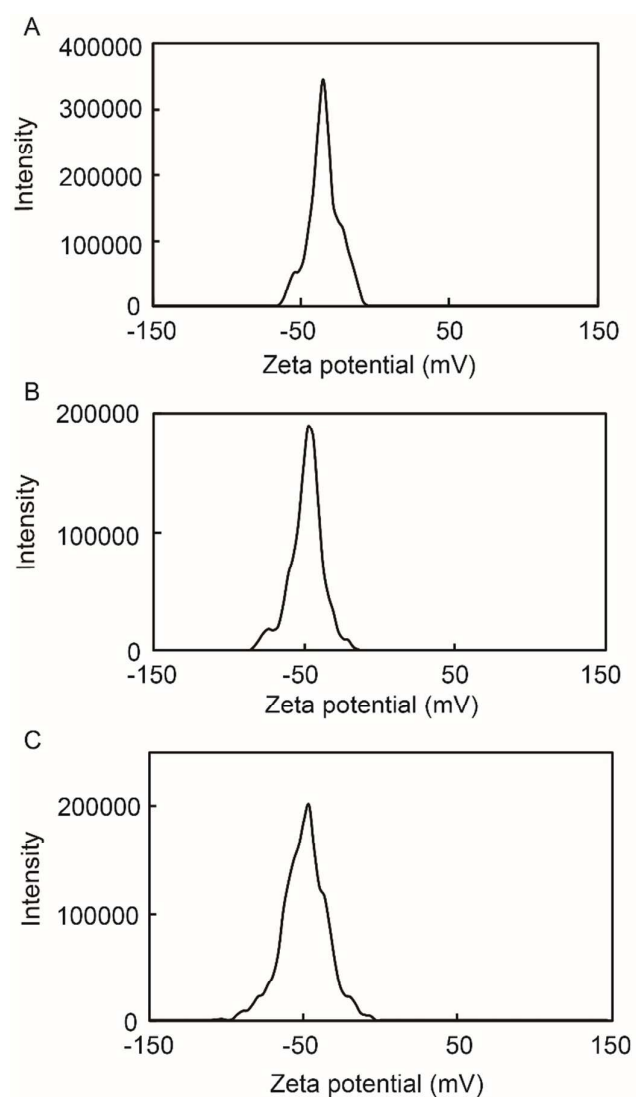

**Figure S2.** Zeta potentials of (A) Ag NPLs, (B) Ag@Au1L NPLs, and (C) Ag@Au2L NPLs.

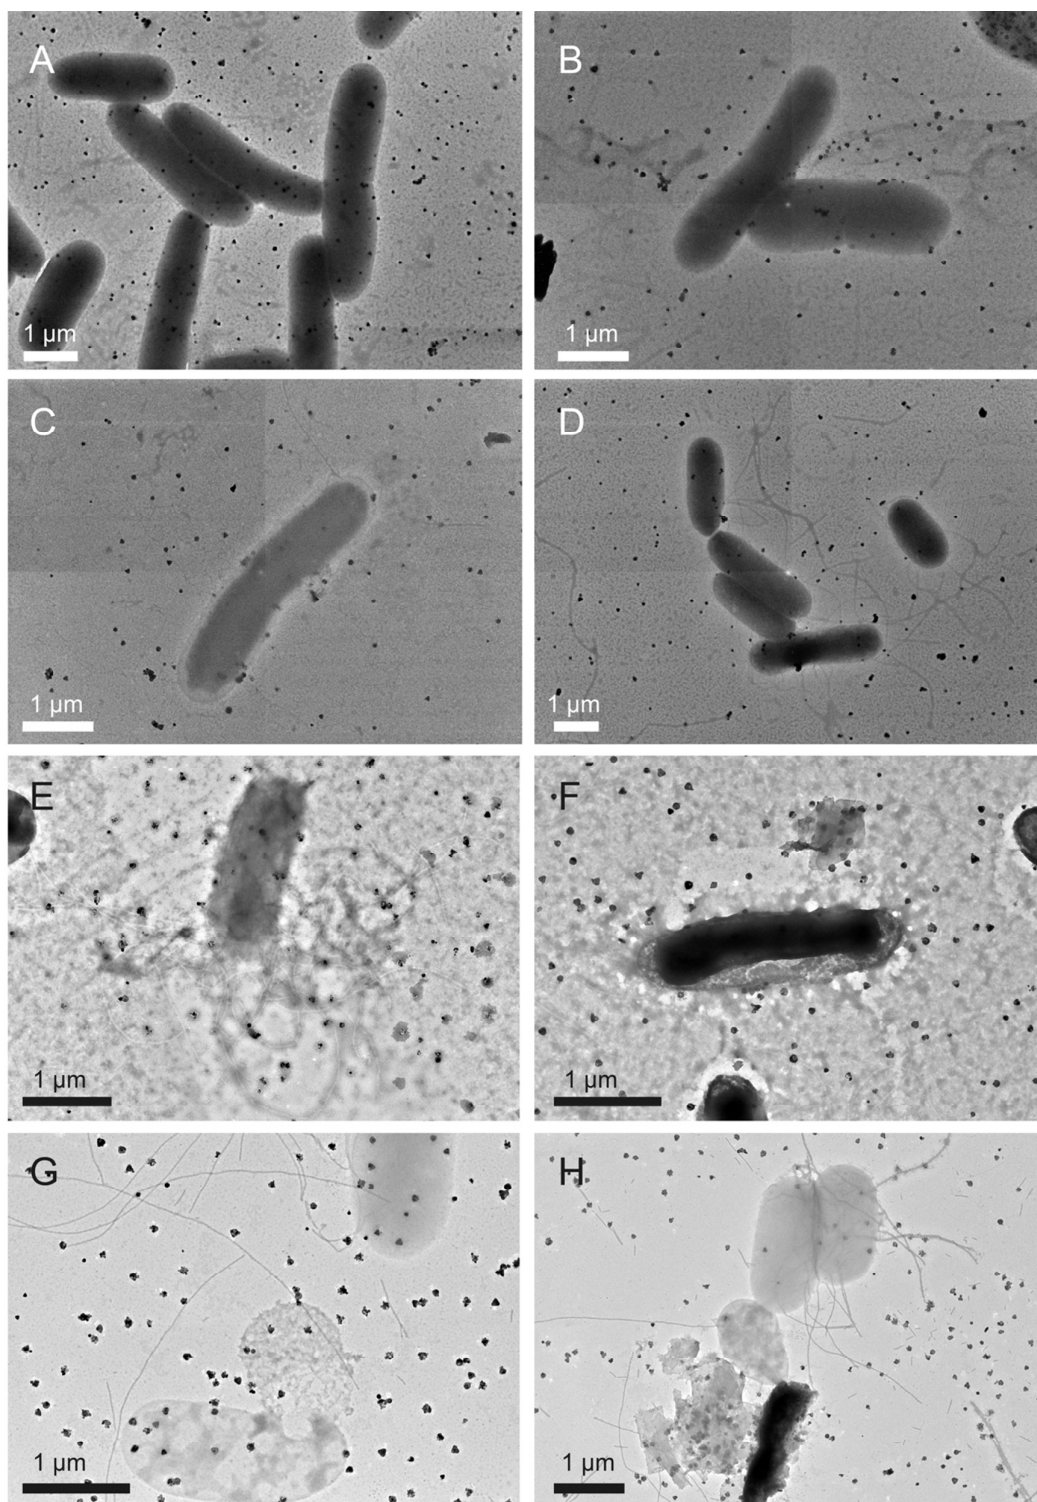

**Figure S3.** TEM images of *S. Typhimurium* incubated with Ag@Au1L NPLs for 1 h (A-D), 3 h (E, F), 6 h (G, H).
